# Supplementary material
Source: PubMed Central journal article supplement (PMC2707821)
Supplement: NIHMS96948-supplement-1_si_001.pdf [file NIHMS96948-supplement-1_si_001.pdf]

## **Supplemental Data**

### **Structure of the redox sensor domain of *Methylococcus capsulatus* (Bath) MmoS**

Uchechi E. Ukaegbu and Amy C. Rosenzweig

Departments of Biochemistry, Molecular Biology and Cell Biology and of Chemistry,  
Northwestern University, Evanston, IL 60208

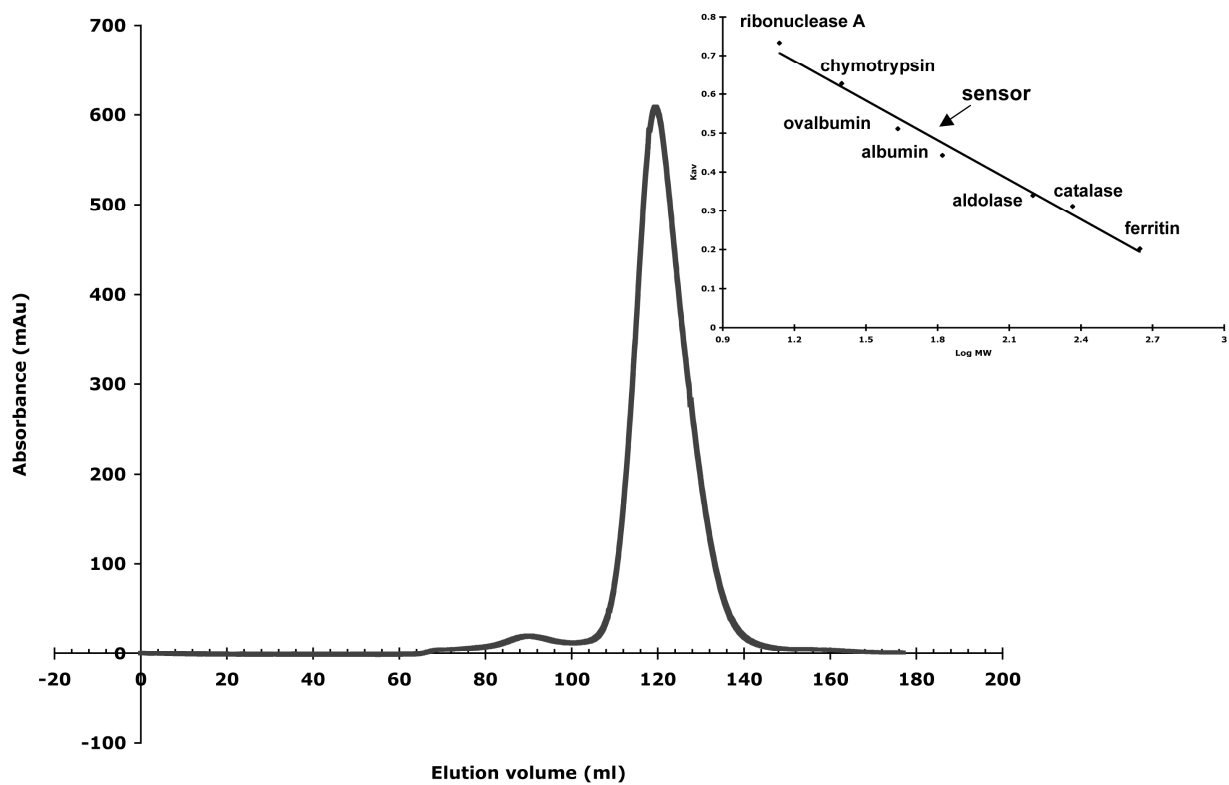

Figure S1: Oligomeric state of the MmoS sensor domain determined by gel filtration on Superdex 200. The sensor domain elutes between albumin (67 kDa) and ovalbumin (43 kDa), consistent with a dimer.

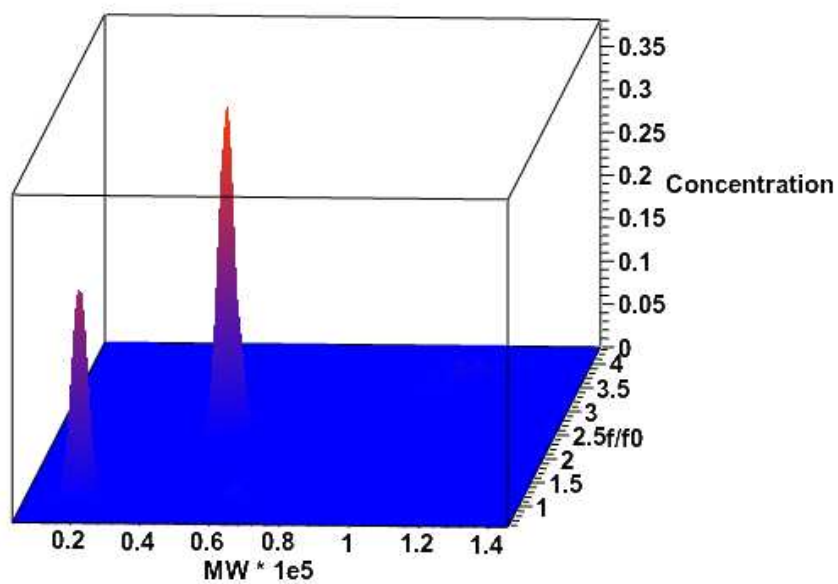

Figure S2: Three-dimensional plot showing results from Genetic - Monte Carlo Ultrascan Analysis. X-axis, MW in Daltons; y-axis, frictional ratio:  $f/f_0$ ; z-axis; % concentration. The lower MW peak corresponds to the monomer; the higher MW peak corresponds to the dimer.

Table S1: Sedimentation velocity analysis of the sensor domain: results from the genetic algorithm -Monte Carlo analysis with 95% confidence intervals

|                                                                                      | Solute 1 (Dimer)<br>Confidence Interval<br>(Min, Max) | Solute 2 (Monomer)<br>Confidence Interval<br>(Min, Max) |
|--------------------------------------------------------------------------------------|-------------------------------------------------------|---------------------------------------------------------|
| Molecular weight (kDa)                                                               | 54.6 (50.5, 57.0)                                     | 22.8 (19.9, 29.3)                                       |
| Sedimentation Coefficient ( $10^{-13}$ )                                             | 2.10 (2.07, 2.10)                                     | 2.44 (2.30, 2.48)                                       |
| Diffusion Coefficient ( $10^{-7}$ )                                                  | 3.53 (3.36, 3.70)                                     | 1.12 (1.13, 1.20)                                       |
| Frictional Ratio, $f/f_0$                                                            | 2.50 (2.39, 2.56)                                     | 1.09 (1.03, 1.15)                                       |
| Cumulative percentage of total concentration (%)                                     | 61.3                                                  | 33.7                                                    |
| Remaining 5.1% comes from one or more species with a molecular weight of 105-132 kDa |                                                       |                                                         |
